# Supplementary material
Source: publisher figshare collection journal article supplement (https://karger.figshare.com/ndownloader/files/9945859)
Supplement: Supplementary file 1 [file 9945859]

**Search Strategy**

**PubMed**

((((hepatocellular carcinoma[Title/Abstract]) OR hepatic malignancy[Title/Abstract]) OR liver tumor[Title/Abstract])) AND (((sarcopenia[Title/Abstract]) OR fragility[Title/Abstract]) OR skeletal muscle[Title/Abstract])

**Embase**

#1. 'sarcopenia':ab,ti OR 'fragility':ab,ti OR 'skeletal muscle':ab,ti

#2. 'hepatocellular carcinoma':ab,ti OR 'hepatic malignancy':ab,ti OR 'liver tumor':ab,ti

#3. #1 AND#2

**Scopus**

( ( "sarcopenia"  OR  "fragility"  OR  "skeletal muscle" )  AND  ( "hepatocellular carcinoma"  OR  "hepatic malignancy"  OR  "liver tumor" ) )
